# Supplementary material for: Paediatric headache management: comparing secondary general paediatric clinics to a tertiary paediatric neurology clinic, using national quality standards
Source: PubMed Central journal article supplement — BMJ Paediatr Open. 2023 Jul 5;7(1):e001956. doi: 10.1136/bmjpo-2023-001956 (PMC10335408; doi:10.1136/bmjpo-2023-001956), 2023-07-05
Supplement: bmjpo-2023-001956.draft_revisions.pdf [file bmjpo-2023-001956.draft_revisions.pdf]

# BMJ Paediatrics Open

BMJ Paediatrics Open is committed to open peer review. As part of this commitment we make the peer review history of every article we publish publicly available.

When an article is published we post the peer reviewers' comments and the authors' responses online. We also post the versions of the paper that were used during peer review. These are the versions that the peer review comments apply to.

The versions of the paper that follow are the versions that were submitted during the peer review process. They are not the versions of record or the final published versions. They should not be cited or distributed as the published version of this manuscript.

BMJ Paediatrics Open is an open access journal and the full, final, typeset and author-corrected version of record of the manuscript is available on our site with no access controls, subscription charges or pay-per-view fees (<http://bmjpaedsopen.bmj.com>).

If you have any questions on BMJ Paediatrics Open's open peer review process please email [info.bmjpo@bmj.com](mailto:info.bmjpo@bmj.com)

# BMJ Paediatrics Open

## **Paediatric headache management: comparing secondary general paediatric clinics to a tertiary paediatric neurology clinic, using national Quality Standards**

|                               |                                                                                                                                                                                                                                                                         |
|-------------------------------|-------------------------------------------------------------------------------------------------------------------------------------------------------------------------------------------------------------------------------------------------------------------------|
| Journal:                      | <i>BMJ Paediatrics Open</i>                                                                                                                                                                                                                                             |
| Manuscript ID                 | bmjpo-2023-001956                                                                                                                                                                                                                                                       |
| Article Type:                 | Letter                                                                                                                                                                                                                                                                  |
| Date Submitted by the Author: | 13-Mar-2023                                                                                                                                                                                                                                                             |
| Complete List of Authors:     | Liew, Elizabeth; University of Nottingham School of Medicine, Academic Division of Child Health<br>Whitehouse, William; University of Nottingham School of Medicine, Academic Division of Child Health; Nottingham University Hospitals NHS Trust, Paediatric Neurology |
| Keywords:                     | Adolescent Health, Health services research, Neurology                                                                                                                                                                                                                  |
|                               |                                                                                                                                                                                                                                                                         |

SCHOLARONE™  
Manuscripts

Paediatric headache management: comparing secondary general paediatric clinics to a tertiary paediatric neurology clinic, using national Quality Standards

The National Institute for Health and Care Excellence (NICE) published a clinical guideline for headaches in adults and young people aged 12 years and older (CG150) in 2012, updated in 2021[1] and supported by Quality Standards (QS42)[2], (table 1).

Table 1: Quality standards for headache management in people aged 12 years and older based on NICE CG150: QS42

|             |                                                                                                                                                      |
|-------------|------------------------------------------------------------------------------------------------------------------------------------------------------|
| Statement 1 | People diagnosed with a primary headache disorder have their headache type classified as part of the diagnosis                                       |
| Statement 2 | People with a primary headache disorder are given information on the risk of medication overuse headache                                             |
| Statement 3 | People with tension-type headache or migraine are not referred for imaging if they do not have signs or symptoms of secondary headache               |
| Statement 4 | People with migraine are advised to take combination therapy with a triptan and either a non-steroidal anti-inflammatory drug (NSAID) or paracetamol |

The aim of this study was to compare the management of children and young people referred for headache to secondary general paediatrics care, with those seen in a tertiary child neurology headache clinic at the same hospital.

#### Methods

Data from local retrospective registered clinical audits of paediatric headache management 2013 through 2019 were combined. In each audit data was extracted from consecutive unselected patients' medical records and tabulated. QS42 was used together with a Clinical Global Impression (CGI) scale: "significantly clinically improved", "no clinically significant change", "significantly clinically worse", at 1 year from first appointment, in those still attending. Simple descriptive statistics were used.

#### Results

145 cases of children referred with headache aged 3-16 years (median 12) were reviewed, (table 2).

Table 2. Results of clinical audits, as assessed by national Quality Standard (QS42) and a Clinical Global Impression (CGI)

|                                                                   | QS1<br>Headache<br>classified | QS2<br>Advice on<br>MOH given                        | QS3<br>MRI head<br>was indicated | QS4<br>Appropriate<br>acute<br>migraine<br>treatment | CGI<br>Clinically<br>significantly<br>improved at 1<br>year                                               |
|-------------------------------------------------------------------|-------------------------------|------------------------------------------------------|----------------------------------|------------------------------------------------------|-----------------------------------------------------------------------------------------------------------|
| T001<br>Tertiary<br>Paediatric<br>Neurology<br>Headache<br>Clinic | 28/28 (100%)                  | Not assessed                                         | Not assessed                     | Not assessed                                         | 20/28 (71%)                                                                                               |
| T002<br>Tertiary<br>Paediatric<br>Neurology<br>Headache<br>Clinic | 82/82 (100%)                  | 47/76 (62%)                                          | 13/18 (72%)                      | 73/76 (96%)                                          | Not assessed                                                                                              |
| T004<br>General<br>Paediatric<br>Clinic                           | 17/35 (49%)                   | 5/35 (14%)<br>overall<br>2/17 (12%)<br>with migraine | 8/14 (57%)                       | 3/8 (38%)                                            | 15/19 (79%)<br>overall<br>1/8 (13%) with<br>migraine but<br>5/8 (63%)<br>discharged/ lost<br>to follow-up |

MOH medication overuse headache; MRI magnetic resonance imaging.

#### Discussion

Although QS42 covered adults and children aged 12 and older, the quality standards seemed well suited for younger children as well and were therefore used for all the children in the clinical audits, regardless of age.

QS1: Half the children attending general paediatric clinics were not given a specific headache diagnosis. This metric could be improved by providing further education on headache to general paediatricians<sup>[3,4]</sup>, and developing paediatricians with expertise in childhood headache and setting up specific paediatric headache clinics.

QS2: Both types of clinic should have done better in warning children and their families about MOH, and this might be improved by having standard literature available on MOH in clinics, adding it to a clinic letter template, and providing an aide memoire for use in clinics.

1  
2  
3  
4  
5  
6  
7  
8  
9  
10  
11  
12  
13  
14  
15  
16  
17  
18  
19  
20  
21  
22  
23  
24  
25  
26  
27  
28  
29  
30  
31  
32  
33  
34  
35  
36  
37  
38  
39  
40  
41  
42  
43  
44  
45  
46  
47  
48  
49  
50  
51  
52  
53  
54  
55  
56  
57  
58  
59  
60

QS3: MRI is not a trivial experience for children and their families, and while it is almost always safe and well tolerated, especially if under general anaesthesia, the wait for an MRI and for the subsequent report can take a toll on families. That almost half of the MRIs requested in general paediatric clinics were not indicated suggests a lack of confidence in assessment and diagnosis, that could be addressed by further education.

QS4: NICE found that dual acute / rescue migraine therapy with a triptan and NSAID or paracetamol was not only more effective than either alone but was more cost effective. There is no reason to think this will not apply in younger children with migraine as well. Again, the care in general paediatric clinics can be improved with respect to this quality standard by ensuring all children get a specific headache diagnosis and paediatricians are trained in paediatric headache.

CGI: In the tertiary paediatric neurology headache clinic T001, most patients had an improvement in their condition, even though they had already failed secondary care treatment, indicating the value of referring on to tertiary care when patients do not respond to first line treatments. Almost 80% attending the secondary care paediatric clinic improved, however of those diagnosed with migraine follow-up data was not available in over half. We think that a brief follow-up by telephone of all cases discharged, at 6 and 12 months would enable services to clearly audit their outcomes and so the value of clinic attendance.

This study is the first attempt to compare the management of headache in children and young people seen in general paediatric clinics and tertiary paediatric neurology headache clinics using a national standard. It highlighted a deficit in the training of general paediatricians with respect to paediatric headache and its management, and showed the value of referral to a more specialist clinic, when needed.

We hope that this local experience will inform and help others improve their care, and act as a baseline benchmark for other services.

#### References

1. Overview: Headaches in over 12s: Diagnosis and management: Guidance [Internet]. NICE. 2012 [cited 2022Dec22]. Available from: <https://www.nice.org.uk/Guidance/CG150>
2. Overview: Headaches in over 12s: Quality standards [Internet]. NICE. 2013 [cited 2023Feb9]. Available from: <https://www.nice.org.uk/guidance/qs42>
3. Children's Headache Training (CHaT) [Internet]. British Paediatrics Neurology Association Short Courses. [cited 2023Feb20]. Available from: <https://courses.bpna.org.uk/index.php?page=childrens-headache-training>
4. Loh NR, Whitehouse WP, Howells R. What is new in migraine management in children and young people? Archives of Disease in Childhood. 2022;107(12):167-72

Conflict of Interest: None declared.

#### Funding Statement:

This research received no specific grants from any funding agency in the public, commercial or not-for-profit sectors.

1  
2  
3 Acknowledgement:

4 We are very grateful for the following colleagues for their collection of data:

5 A Michael, A Ponnampalam, M Prasad, K Vraka.  
6  
7

8 Contributorship:

9 EL reviewed, tabulated and analysed the results, and wrote the first draft.

10 WPW conceived the study, helped with data analysis and edited the final draft.  
11  
12  
13  
14  
15  
16  
17  
18  
19  
20  
21  
22  
23  
24  
25  
26  
27  
28  
29  
30  
31  
32  
33  
34  
35  
36  
37  
38  
39  
40  
41  
42  
43  
44  
45  
46  
47  
48  
49  
50  
51  
52  
53  
54  
55  
56  
57  
58  
59  
60

Confidential: For Review Only
