# Supplementary material for: Paediatric headache management: comparing secondary general paediatric clinics to a tertiary paediatric neurology clinic, using national quality standards
Source: PubMed Central journal article supplement — BMJ Paediatr Open. 2023 Jul 5;7(1):e001956. doi: 10.1136/bmjpo-2023-001956 (PMC10335408; doi:10.1136/bmjpo-2023-001956), 2023-07-05
Supplement: bmjpo-2023-001956.reviewer_comments.pdf [file bmjpo-2023-001956.reviewer_comments.pdf]

## PEER REVIEW HISTORY

BMJ Paediatrics Open publishes all reviews undertaken for accepted manuscripts. Reviewers are asked to complete a checklist review form and are provided with free text boxes to elaborate on their assessment. These free text comments are reproduced below.

### ARTICLE DETAILS

|                            |                                                                                                                                                            |
|----------------------------|------------------------------------------------------------------------------------------------------------------------------------------------------------|
| <b>TITLE (PROVISIONAL)</b> | Paediatric headache management: comparing secondary general paediatric clinics to a tertiary paediatric neurology clinic, using national Quality Standards |
| <b>AUTHORS</b>             | Liew, Elizabeth<br>Whitehouse, William                                                                                                                     |

### VERSION 1 - REVIEW

|                        |                                                                      |
|------------------------|----------------------------------------------------------------------|
| <b>REVIEWER</b>        | John Stephen<br>United Kingdom of Great Britain and Northern Ireland |
| <b>REVIEW RETURNED</b> | 01-Apr-2023                                                          |

|                         |                                                                                                                                                                                                                                                                                                                                                                                                                                                                                                                                                                                                                                                                                                                                                                                                                                                                                                                                                                                                                                                                                                                                             |
|-------------------------|---------------------------------------------------------------------------------------------------------------------------------------------------------------------------------------------------------------------------------------------------------------------------------------------------------------------------------------------------------------------------------------------------------------------------------------------------------------------------------------------------------------------------------------------------------------------------------------------------------------------------------------------------------------------------------------------------------------------------------------------------------------------------------------------------------------------------------------------------------------------------------------------------------------------------------------------------------------------------------------------------------------------------------------------------------------------------------------------------------------------------------------------|
| <b>GENERAL COMMENTS</b> | <p>This is a welcome study which highlights the need for improved training in diagnosis and management of paediatric headaches in general Paediatricians (and, by extension, GPs.) This will improve knowledge and avoidance of Medication Overuse Headache (MOH) and unnecessary MRI scans, and improve confidence in managing headaches among Paediatricians which will result in less anxiety in doctors and patients, and fewer referrals to tertiary clinics. The suggestion of Paediatricians with special interest in headache setting up headache clinics is an excellent way to extend knowledge to their staff. I did not understand why the first tertiary clinic T001 of 28 patients did not review QS2-4, making this group ineligible for comparison.</p> <p>The total number of patients in the study was surprisingly small (145) given the 6 year study period.</p> <p>The need for clinics to audit their activities and outcomes is highlighted including the suggestion for long term follow up by phone.</p> <p>The benefit and need of specific training courses in headache like the BPNA CHaT course is clear .</p> |
|-------------------------|---------------------------------------------------------------------------------------------------------------------------------------------------------------------------------------------------------------------------------------------------------------------------------------------------------------------------------------------------------------------------------------------------------------------------------------------------------------------------------------------------------------------------------------------------------------------------------------------------------------------------------------------------------------------------------------------------------------------------------------------------------------------------------------------------------------------------------------------------------------------------------------------------------------------------------------------------------------------------------------------------------------------------------------------------------------------------------------------------------------------------------------------|

### VERSION 1 – AUTHOR RESPONSE

N/A
